# Supplementary material
Source: MDPI journal article supplement (https://www.mdpi.com/2072-4292/13/10/1990)
Supplement: s1 [file s1]

Skill score value

Frequency Bias

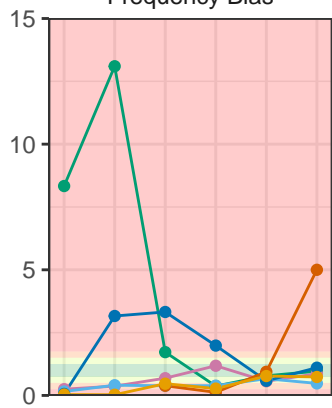

Frequency of Hits

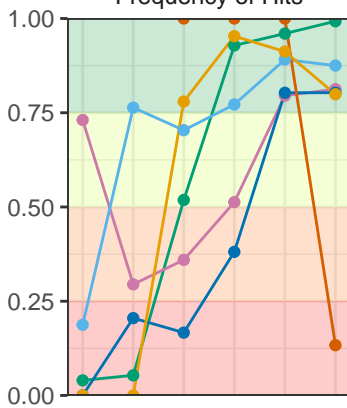

Frequency of Misses

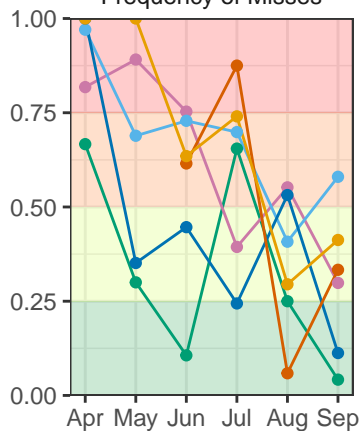

Hanssen-Kuipers Score

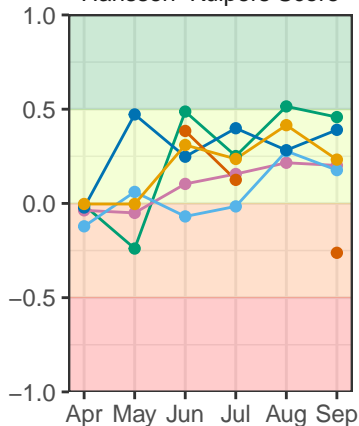

Odds Ratio

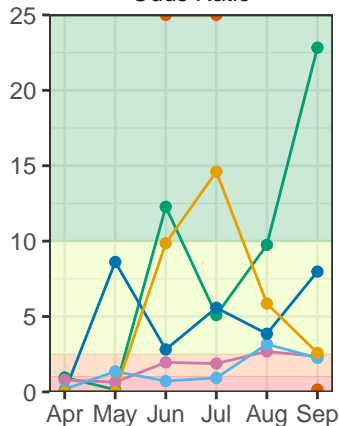

Drought

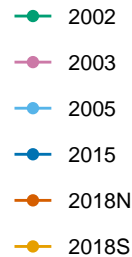

Score

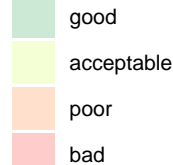

Month
