# Supplementary material
Source: MDPI journal article supplement (https://www.mdpi.com/2072-4292/13/10/1990)

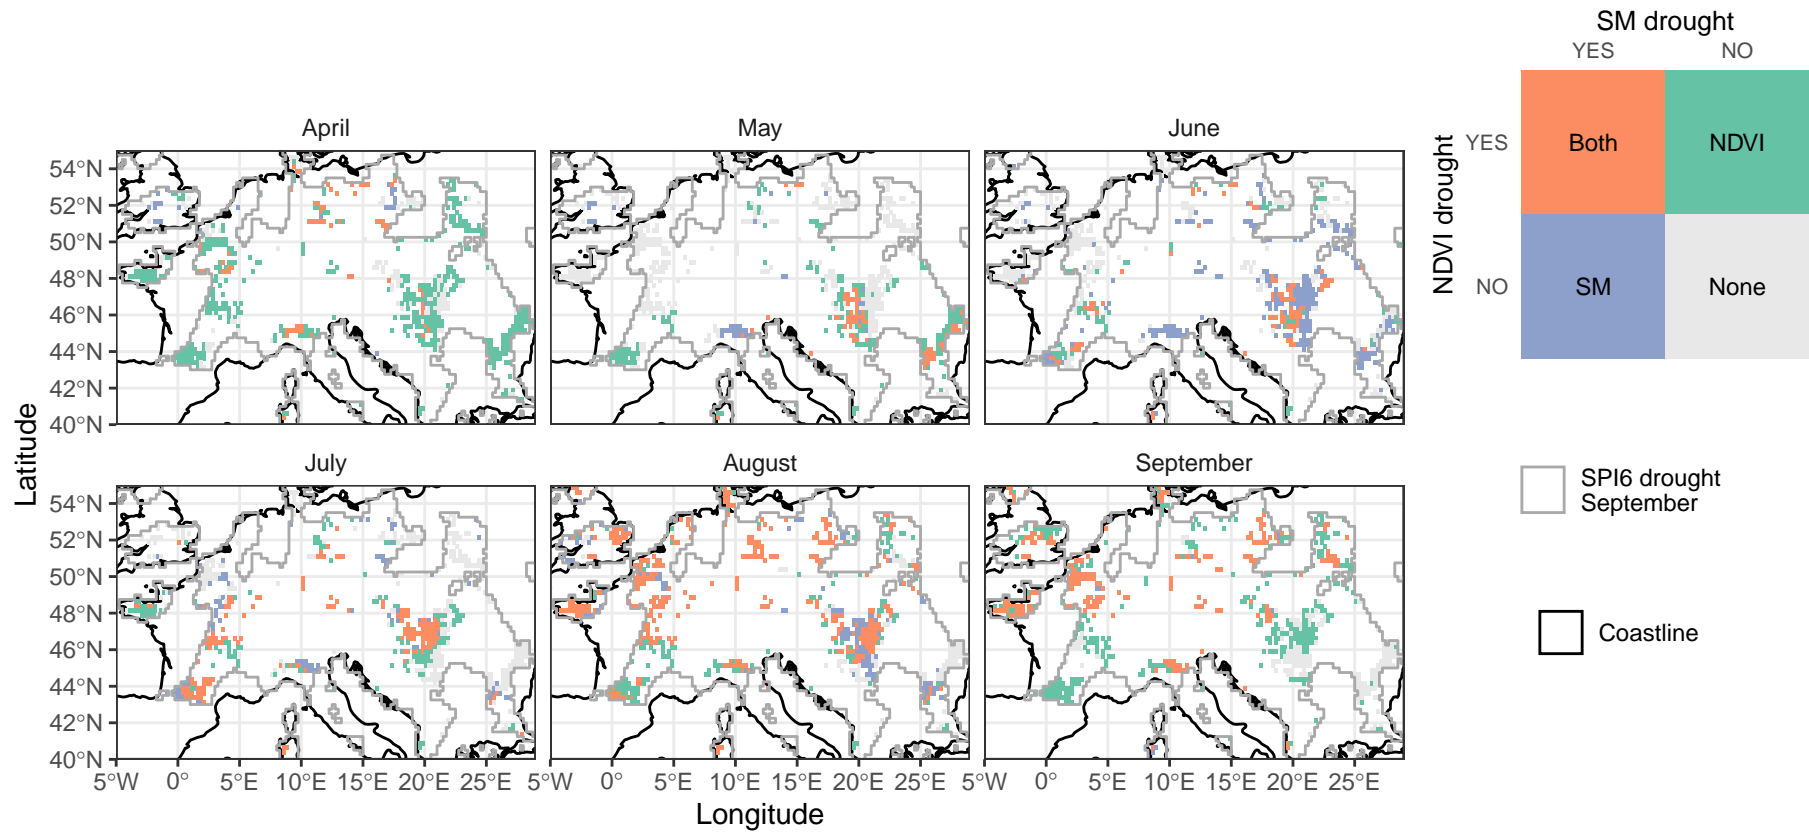

Supplement: s1 [file s1]

Latitude

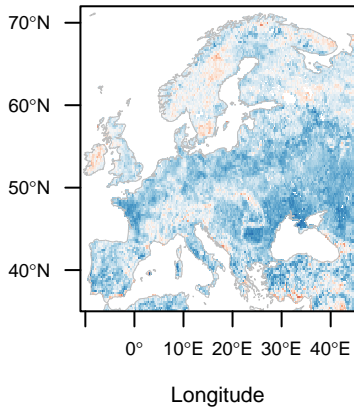

Month

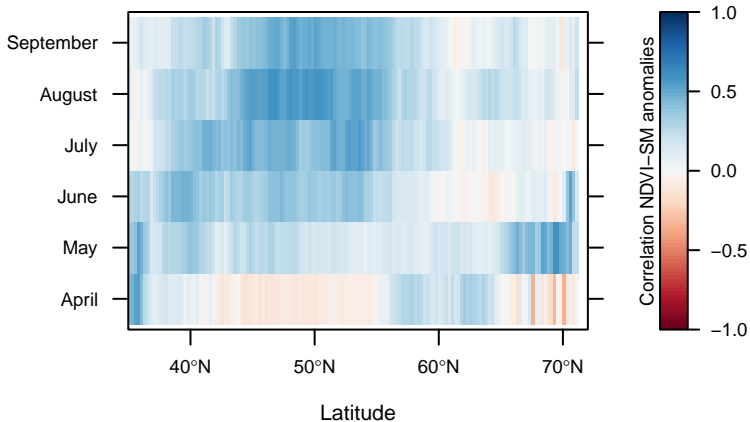

Supplement: s1 [file s1]

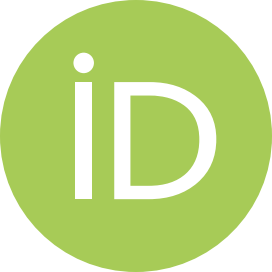

Supplement: s1 [file s1]

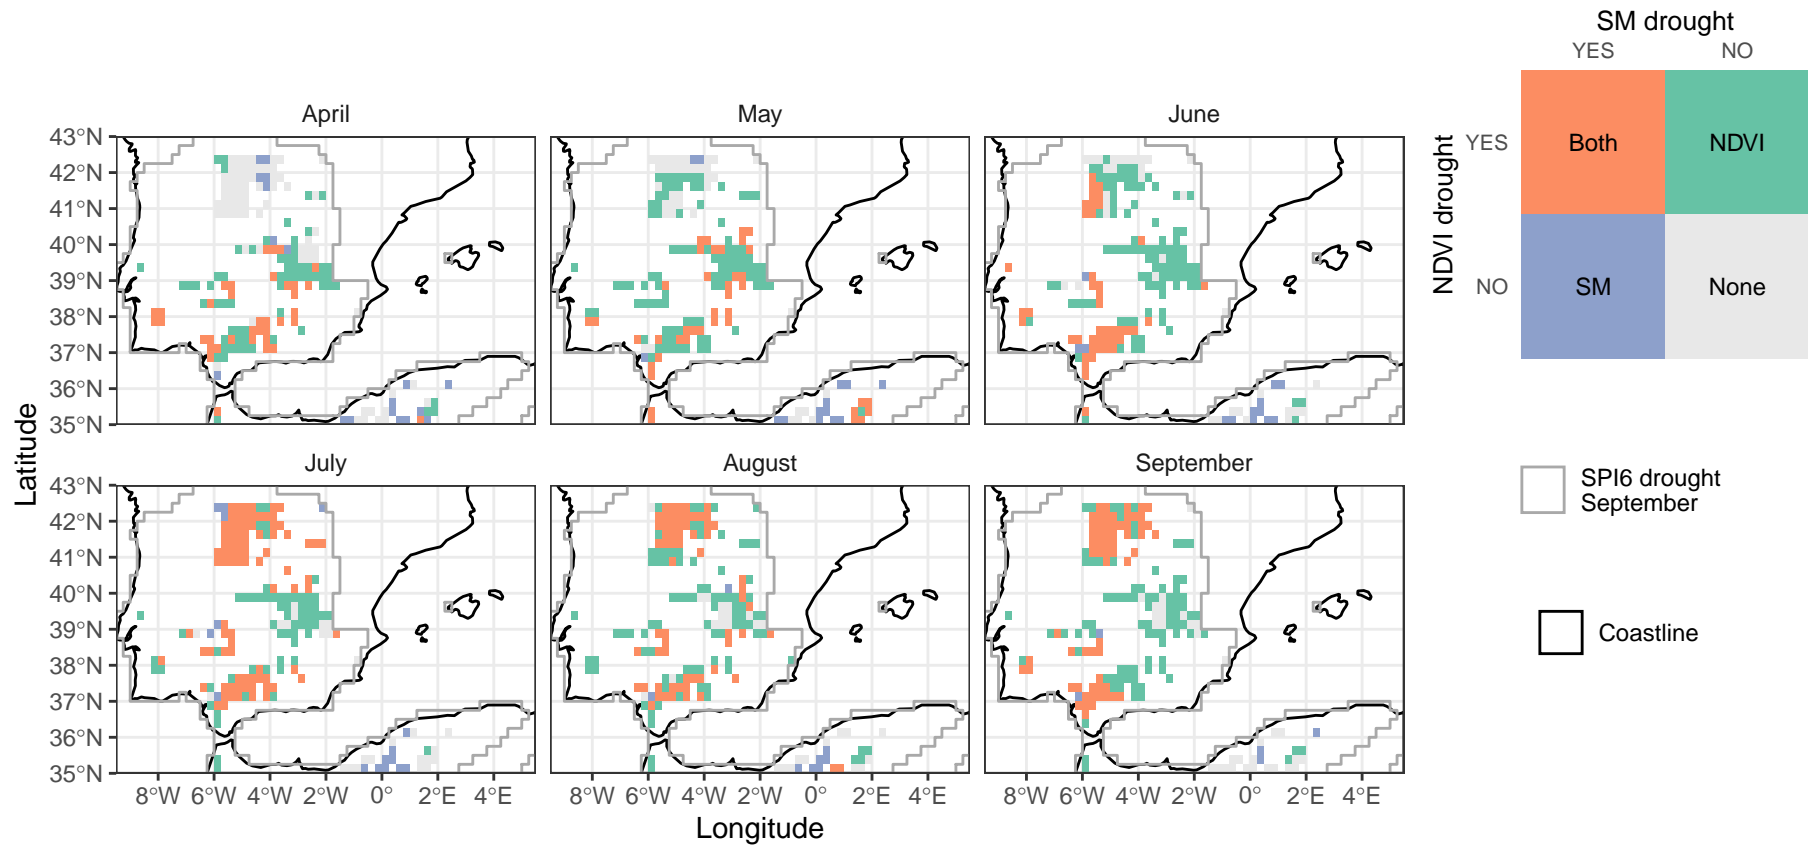

Supplement: s1 [file s1]

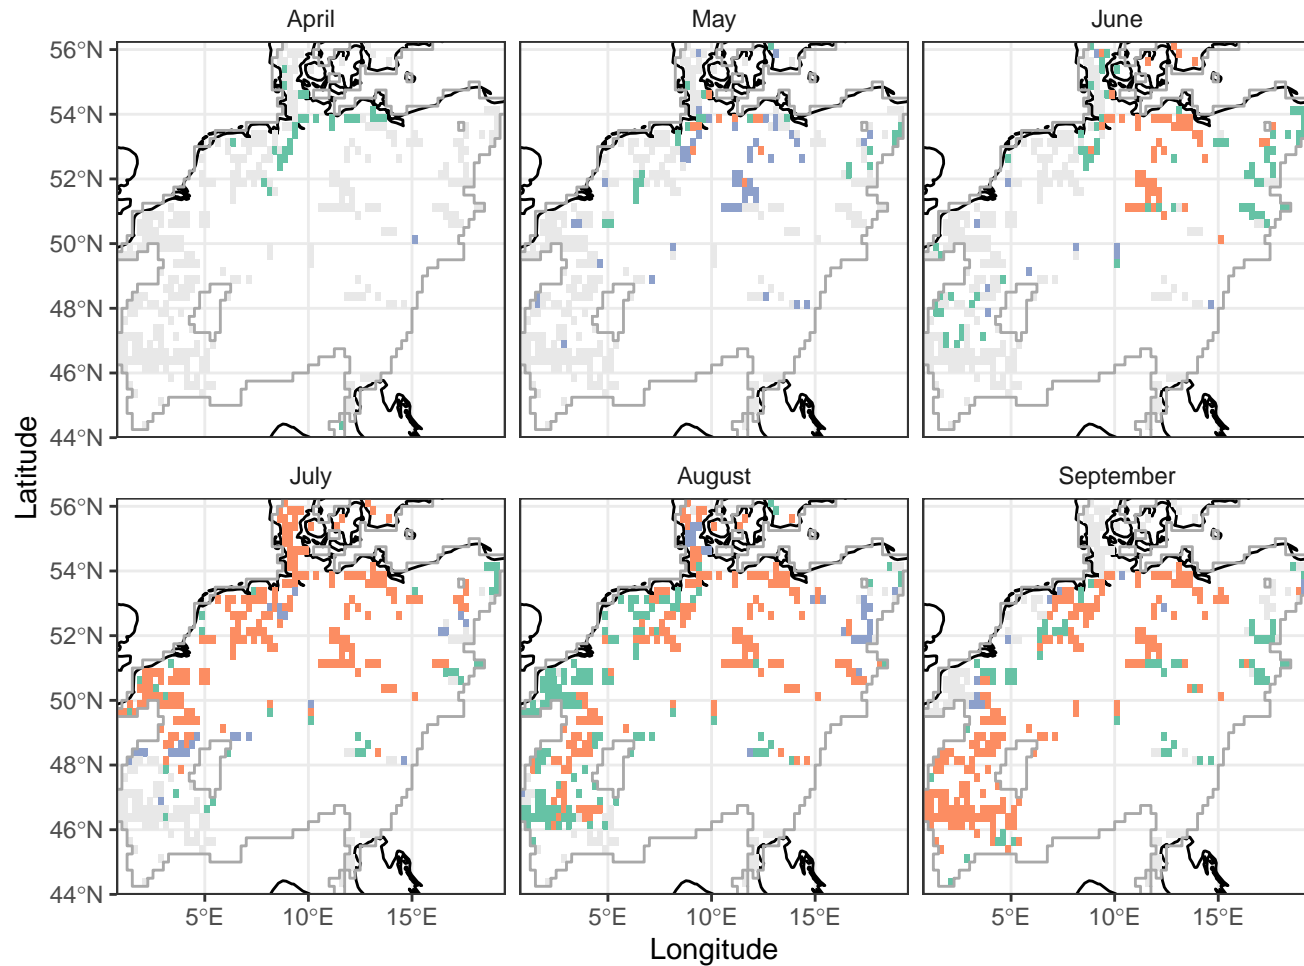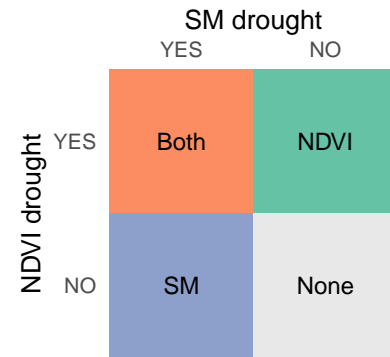

SPI6 drought  
September

Coastline

Supplement: s1 [file s1]

NDVI anomaly [-]

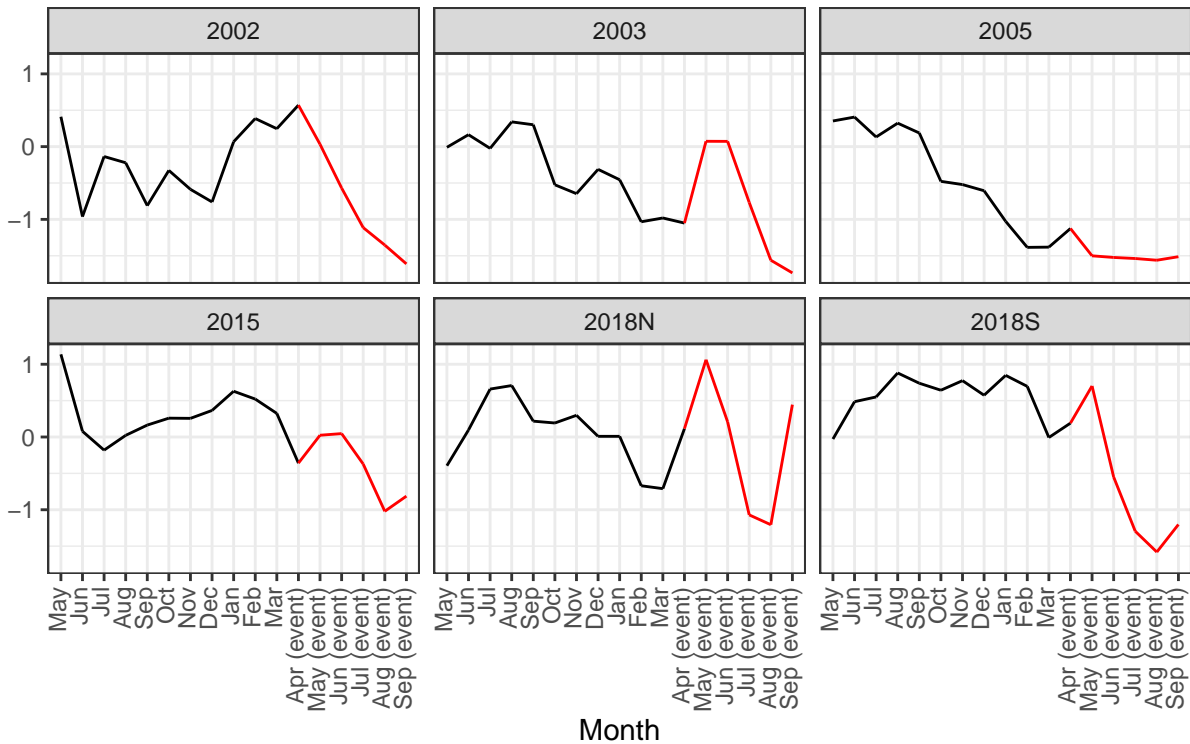

Supplement: s1 [file s1]

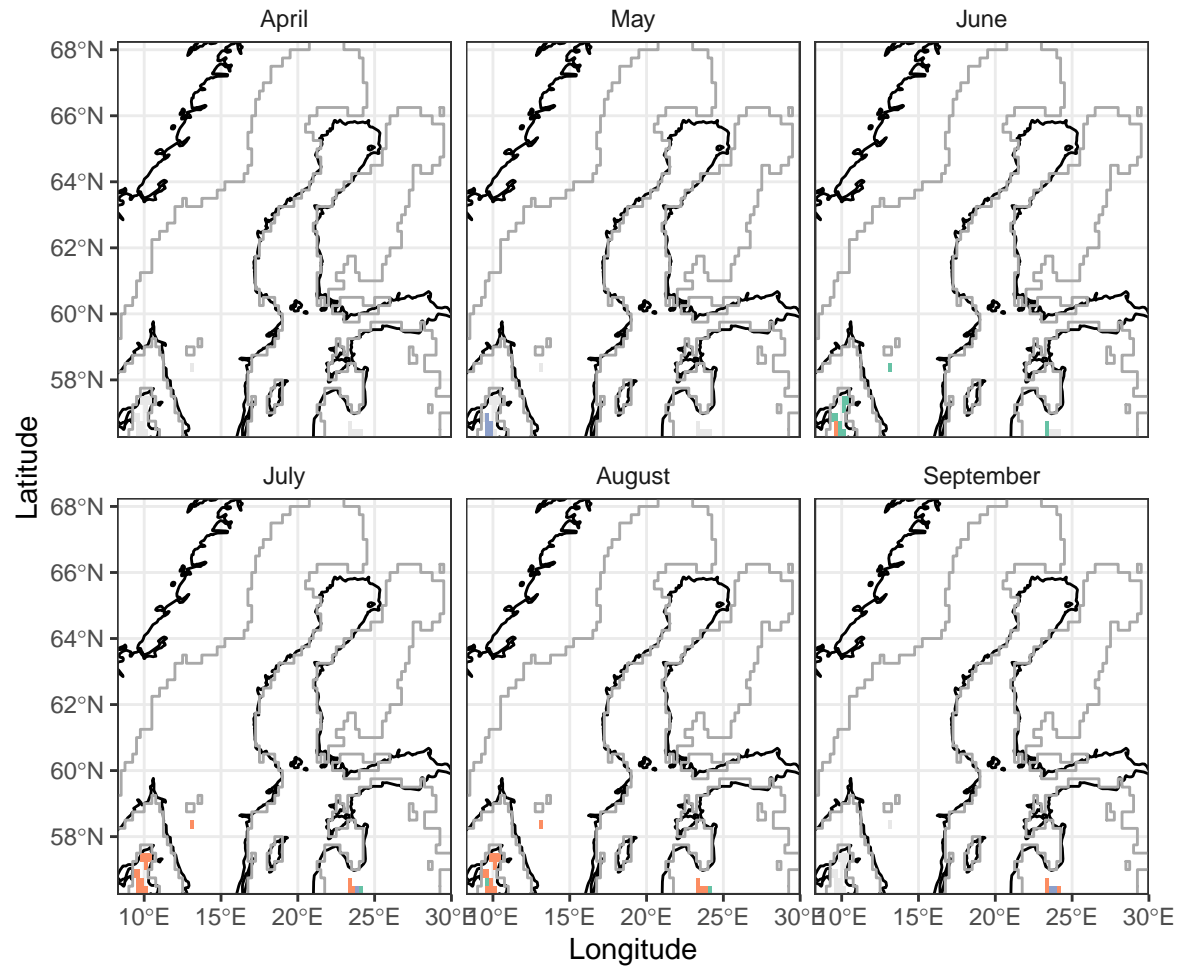

□ SPI6 drought September

□ Coastline

Supplement: s1 [file s1]

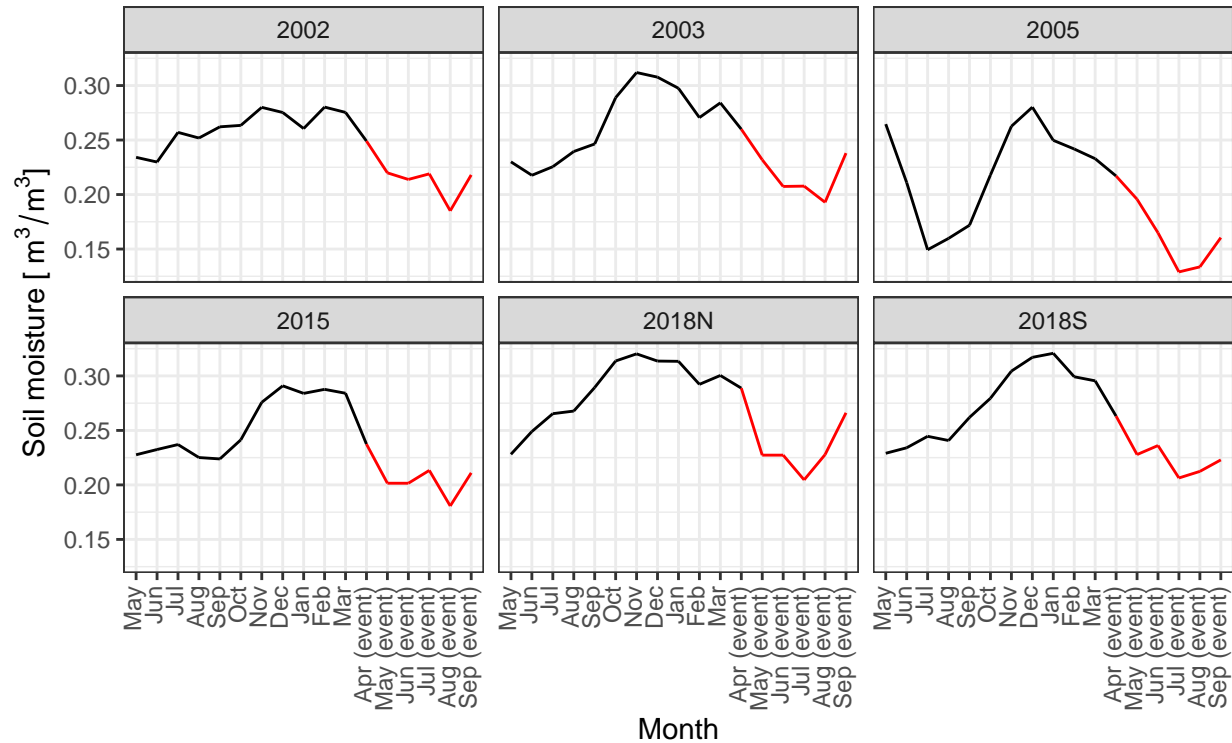

Supplement: s1 [file s1]

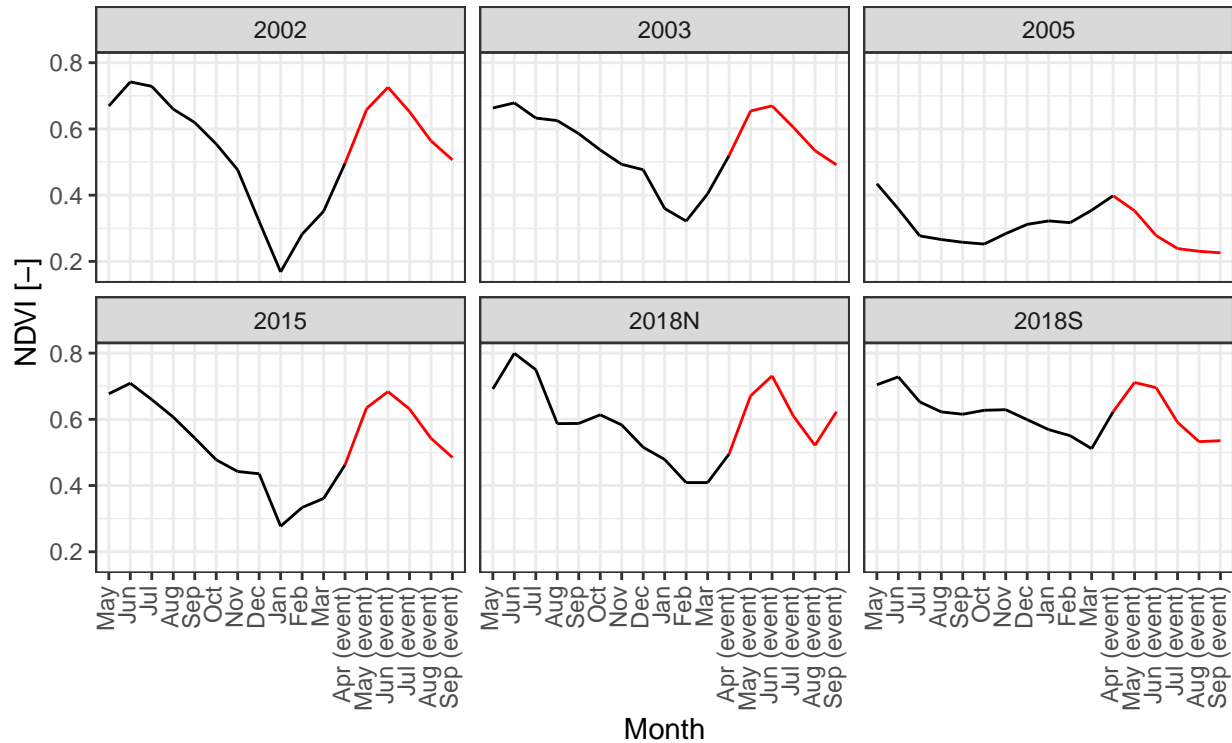

Supplement: s1 [file s1]

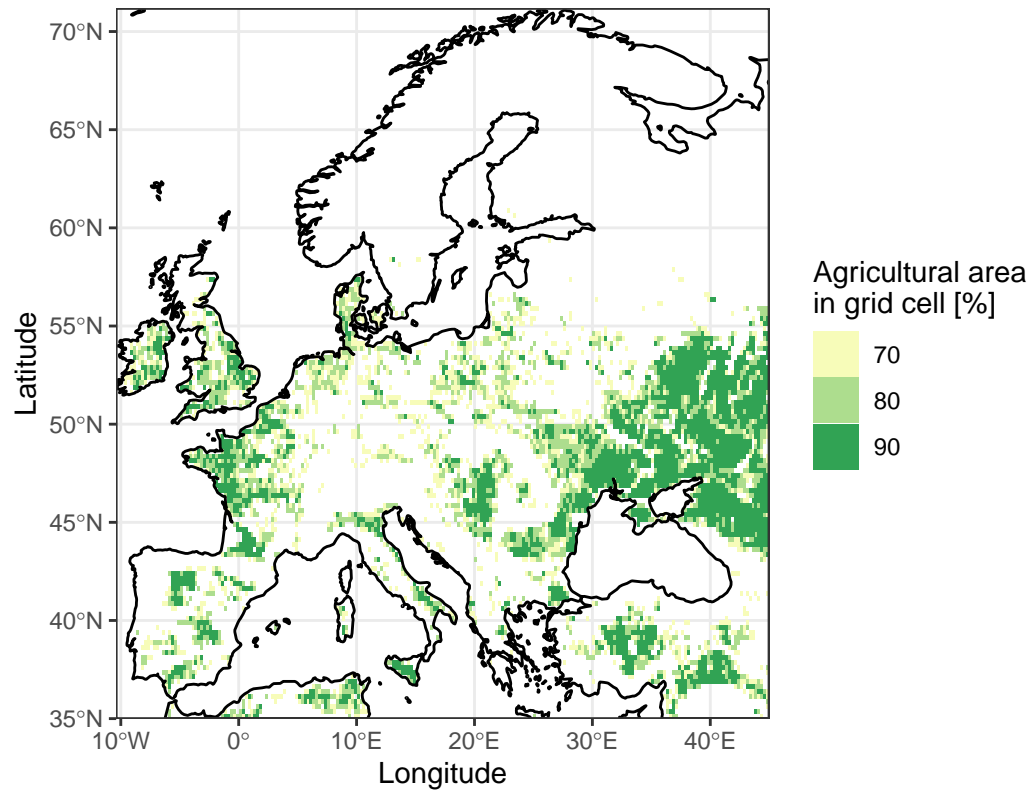

Supplement: s1 [file s1]

Soil moisture anomaly [-]

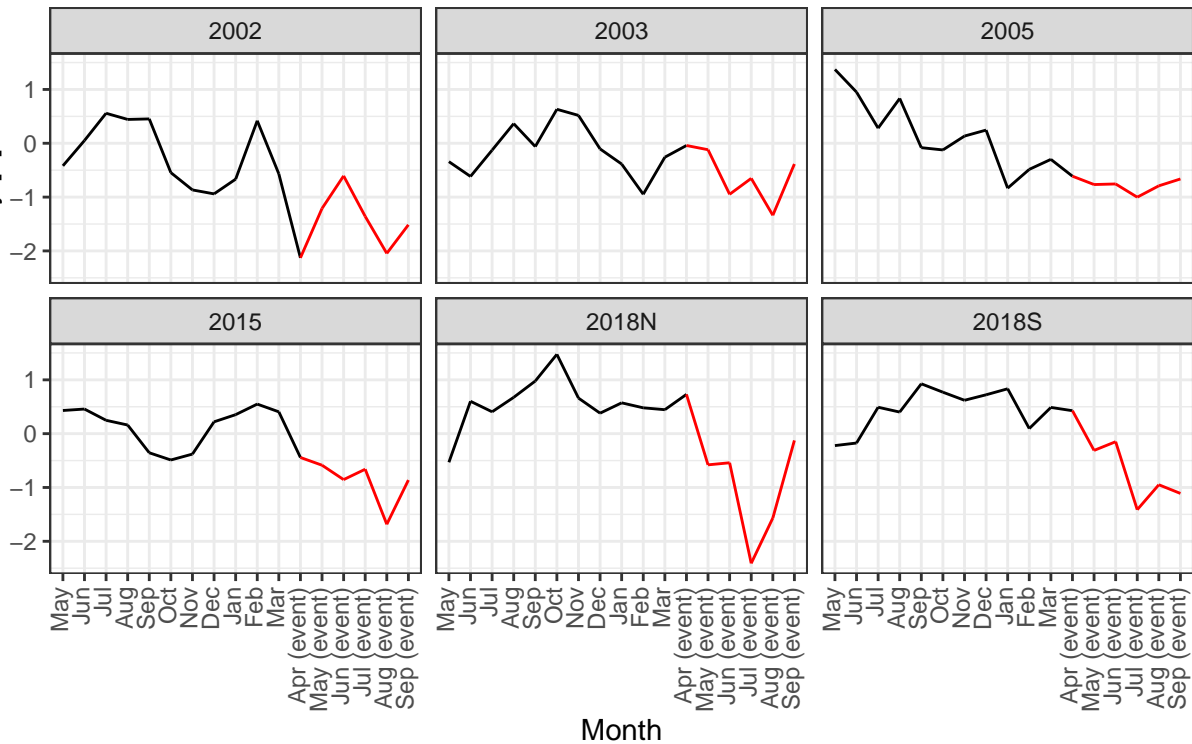

Supplement: s1 [file s1]

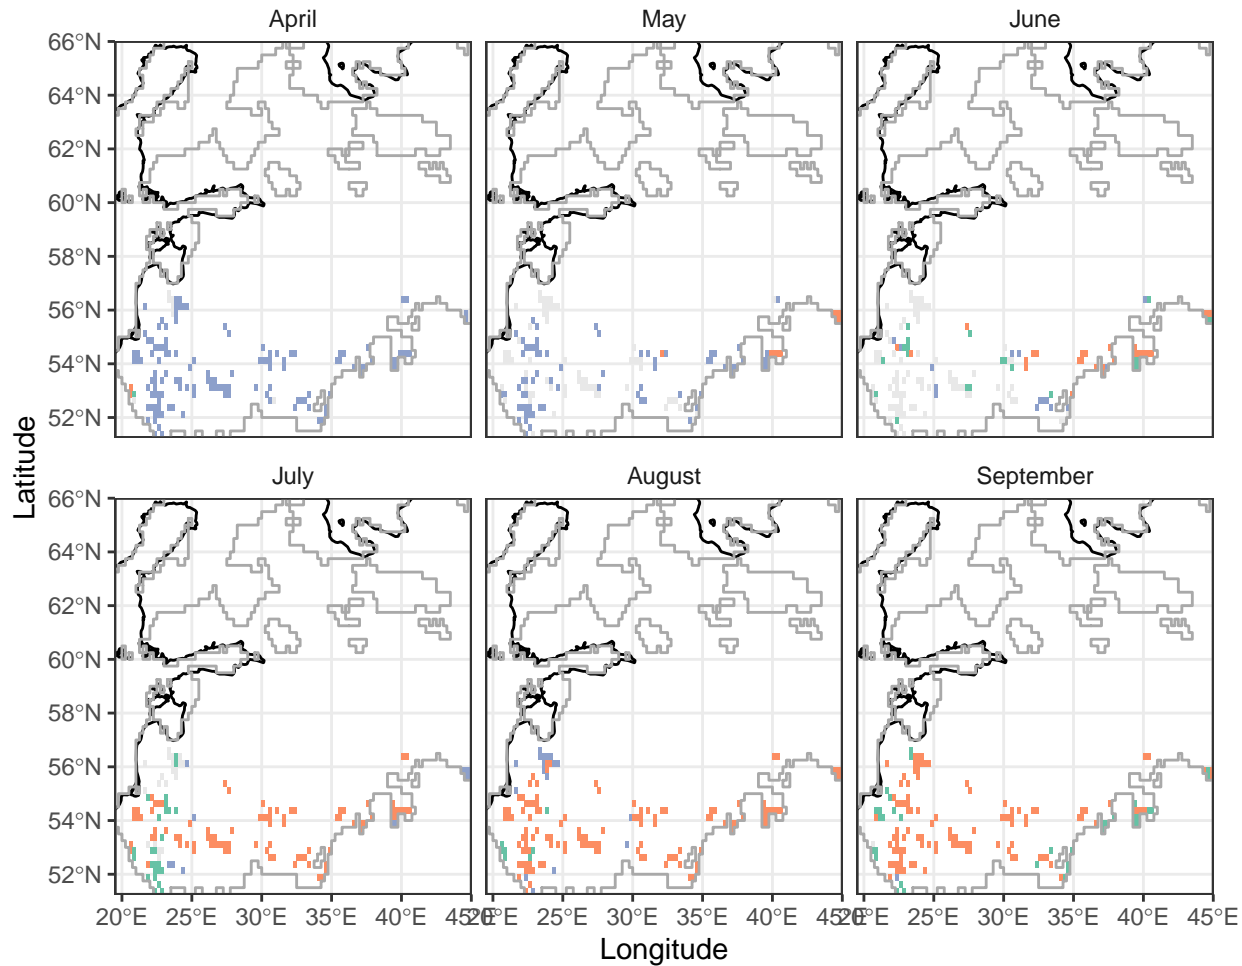

 SPI6 drought September

 Coastline

Supplement: s1 [file s1]
